1                   **Experimental methodologies can affect pathogenicity of**  
2                                 *Batrachochytrium salamandrivorans* **infections**

3  
4  
5     Rajeev Kumar<sup>1</sup>, Daniel A. Malagon<sup>1</sup>, Edward Davis Carter<sup>1</sup>, Debra L. Miller<sup>1,2</sup>, Markese L.  
6     Bohanon<sup>1</sup>, Joseph Patrick W. Cusaac<sup>1</sup>, Anna C. Peterson<sup>1</sup>, and Matthew J. Gray<sup>1\*</sup>

7  
8  
9     <sup>1</sup>Center for Wildlife Health, University of Tennessee Institute of Agriculture, Knoxville,  
10    Tennessee, United States

11    <sup>2</sup>Department of Biomedical and Diagnostic Sciences, College of Veterinary Medicine, University  
12    of Tennessee, Knoxville, Tennessee, United States

13  
14  
15    \*Corresponding author

16    E-mail: [mgray11@utk.edu](mailto:mgray11@utk.edu) (MJG)

19 Author contributions: RK, DAM, and MJG designed and performed the experiment with EDC,  
20 MLB, and JPC. DLM did the histopathology. DAM and EDC performed the statistical analyses.  
21 RK, DAM, EDC, MLB, JPC, MJG and ACP wrote the manuscript. MJG and DLM secured  
22 funding, supervised the project, and contributed to writing and editing.

23

## 24 **Abstract**

25 Controlled experiments are one approach to understanding the pathogenicity of etiologic agents  
26 to susceptible hosts. The recently discovered fungal pathogen, *Batrachochytrium*  
27 *salamandrivorans* (*Bsal*), has resulted in a surge of experimental investigations because of its  
28 potential to impact global salamander biodiversity. However, variation in experimental  
29 methodologies could thwart knowledge advancement by introducing confounding factors that  
30 make comparisons difficult among studies. Thus, our objective was to evaluate if variation in  
31 experimental methods changed inferences made on the pathogenicity of *Bsal*. We tested whether  
32 passage duration of *Bsal* culture, exposure method of the host to *Bsal* (water bath vs. skin  
33 inoculation), *Bsal* culturing method (liquid vs. plated), host husbandry conditions (aquatic vs.  
34 terrestrial), and skin swabbing frequency influenced disease-induced mortality in a susceptible  
35 host species, the eastern newt (*Notophthalmus viridescens*). We found that disease-induced  
36 mortality was faster for eastern newts when exposed to a low passage isolate, when newts were  
37 housed in terrestrial environments, and if exposure to zoospores occurred via water bath. We did  
38 not detect differences in disease-induced mortality between culturing methods or swabbing  
39 frequencies. Our results illustrate the need to standardize methods among *Bsal* experiments; we  
40 provide suggestions for future experiments in the context of hypothesis testing.

41

42

43

44

## 45 **Introduction**

46 *Batrachochytrium salamandrivorans* (*Bsal*) is an emerging fungal pathogen of global  
47 conservation concern(1-3). *Bsal* has been identified as the causal agent in recent near extirpations  
48 of wild fire salamanders (*Salamandra salamandra*) in Belgium and the Netherlands(4, 5), and  
49 has been detected in live amphibians in captivity and moving through international trade(6-8).  
50 Controlled experiments where hosts are exposed to *Bsal* under standardized conditions suggest  
51 that the pathogen has a broad host range, including several salamander and anuran families(4, 9).  
52 A central tenet to understanding *Bsal* invasion threat is estimating host susceptibility to infection,  
53 and whether host infection progresses to clinical disease hence its pathogenicity (10).

54 One approach to estimating pathogenicity of etiologic agents is using exposure  
55 experiments(11, 12). However, variation in pathogen culturing methods, host husbandry  
56 conditions, and pathogen exposure methods could result in different inferences made on  
57 pathogenicity (13). For example, Martel et al. (9) inferred that the eastern newt (*Notophthalmus*  
58 *viridescens*) was hyper-sensitive to *Bsal* infection, because 100% of individuals exposed to  
59  $5 \times 10^3$  zoospores died within 34 days. Longo et al. (14) reported ca. 50% mortality of eastern  
60 newts exposed to the same dose of *Bsal* over 18 weeks, with some individuals clearing the  
61 pathogen and surviving to the end of the experiment. Several explanations were offered for the  
62 difference in findings between these studies, such as population origin, small sample, and  
63 possible co-infection with *B. dendrobatidis* (*Bd*,(14)), which is another pathogenic chytrid  
64 fungus responsible for widespread amphibian population declines (15); however for the most  
65 part, differences in experimental design were not discussed. Martel et al. (9) used liquid culture  
66 as the inoculum, exposed eastern newts to *Bsal* by pipetting it directly on the dorsum, and housed

67 individuals terrestrially; whereas, Longo et al. (14) used agar plates for culturing *Bsal*, exposed  
68 individuals to zoospores in a water bath, and newts could select between aquatic and terrestrial  
69 conditions(9,14). The number of cell culture passages also differed between studies, which could  
70 affect *Bsal* pathogenicity (16, 17). To detect infection, both studies swabbed individuals;  
71 however, Martel et al. (9) swabbed once per week and Longo et al. (14) swabbed once every two  
72 weeks. Given that *Bsal* is a skin pathogen and swabbing removes skin cells and chytrid  
73 zoospores(5, 18), it is possible that swabbing frequency could affect host-pathogen interactions.  
74 Although the North American *Bsal* Task Force provides recommendations for controlled  
75 experiments using *Bsal* on their website (<http://www.salamanderfungus.org>), most of the  
76 recommendations are based on expert opinion and investigator preference.

77         There is a need to evaluate the potential impacts of variation in protocols for *Bsal*  
78 susceptibility experiments on host-pathogen interactions. Our objectives were to compare  
79 differences in *Bsal* pathogenicity (i.e., likelihood of infection leading to clinical disease and  
80 death, (19)) between the following treatments: (1) low versus high passage duration of culture,  
81 (2) water bath versus pipetted exposure, (3) liquid versus plated culture, (4) aquatic versus  
82 terrestrial housing of the host, and (5) skin swabbing frequency (every 6 days, every 12 days, or  
83 only at necropsy). Given results from these comparisons, we provide recommendations on  
84 designing future *Bsal* experiments.

85

## 86 **Materials and methods**

### 87 **Methods common among experiments**

88 Below are the methods common for all experiments we performed unless noted  
89 otherwise. Sample sizes, *Bsal* doses, host life-stage and swabbing frequencies are in Table 1.  
90 Similar to Martel et al. (9) and Longo et al. (14), we used post-metamorphic eastern newts  
91 (*Notophthalmus viridescens*) for all experiments. Newts were collected from one site in Knox  
92 County, Tennessee, USA (Scientific Collection Permit #1504), and were confirmed to be *Bd*  
93 negative prior to the start of each experiment. We performed each experiment at 15°C in  
94 environmental growth chambers, with relative humidity maintained between 80 – 90%. All  
95 water-bath exposed newts were exposed to *Bsal* in 100-mL containers with 1 mL inoculum and 9  
96 mL autoclaved dechlorinated water. The *Bsal* used in our experiments was originally isolated by  
97 An Martel and Frank Pasmans from a morbid wild fire salamander in the Netherlands (isolate:  
98 AMFP13/1), and had been passaged (i.e., split) in cell culture ca. 20 times (P20) at the start of  
99 our experiments. The 200-passage isolate (P200) was maintained in culture and split ca.  
100 biweekly, while P20 was cryopreserved and revived for each experiment. We grew *Bsal* on  
101 TGH plates and harvested zoospores by flooding each plate with a total of 7 mL autoclaved  
102 dechlorinated water and filtering the suspended zoospores through a 20-um filter to remove  
103 zoosporangia. The target exposure dose was then prepared by diluting the *Bsal* zoospores in  
104 autoclaved dechlorinated water (Table 1). For the exposure route, housing and swabbing  
105 experiments, we exposed animals to a single dose of  $5 \times 10^6$  zoospores. For passage and culture  
106 experiments, we used a lower dose of  $1 \times 10^6$  and  $5 \times 10^5$  zoospores because we were unable to  
107 harvest greater quantities for these experiments. These exposure doses were sufficient to cause  
108 infection and induce *Bsal* chytridiomycosis (9). The control newts used for each experiment were  
109 exposed to autoclaved dechlorinated water under identical conditions. After a 24-hr exposure  
110 period, we removed the animals from the exposure containers and placed them in housing

111 containers. We housed newts terrestrially in 710-mL plastic containers with a moist paper towel  
112 and PVC cover object. In the housing experiment, we aquatically housed newts in a circular  
113 2000-cm<sup>3</sup> container with 300 mL of dechlorinated water. To minimize accumulation of  
114 nitrogenous waste, we transferred newts into clean containers and replaced all the materials  
115 every three days. We fed terrestrially housed newts small crickets corresponding to 8% of their  
116 body mass when containers were changed. Aquatically housed newts were fed bloodworms. We  
117 checked newts twice daily for gross signs of *Bsal* chytridiomycosis (e.g., necrotic lesions, skin  
118 sloughing, lethargy), and humanely euthanized individuals that lost righting reflex or at the end  
119 of the experiment. .

120 To detect *Bsal* infection and estimate load, we swabbed the skin of newts every six days,  
121 except for the swabbing frequency experiment (see below). We began swabbing four days post-  
122 exposure following the standardized protocol used for *B. dendrobatidis*(20). Genomic DNA  
123 (gDNA) was extracted from each swab using Qiagen DNeasy Blood and Tissue kits (Qiagen,  
124 Hilden, Germany). We estimated *Bsal* infection load using *Bsal* singleplex qPCR methods  
125 similar to those described in Blooi et al.(21). All qPCR reactions were amplified using an  
126 Applied Biosystems Quantstudio 6 Flex qPCR instrument (Thermo Fisher Scientific, USA).  
127 Each swab sample was run in duplicate and considered positive if both replicates amplified  
128 within 50 cycles. For the first and last swabs, we also verified that newts were *Bd* negative using  
129 qPCR. For newts that died during the experiment, we confirmed *Bsal* chytridiomycosis by  
130 examining histological cross-sections of hematoxylin and eosin stained epidermal tissue (22).  
131 Representative images of each experimental treatment are provided. We used *Bsal*-induced  
132 mortality confirmed by qPCR and histopathology as evidence of pathogenicity (22).

133

## 134 **Experiment-specific methods**

135 In order to minimize the total number of animals used for these experiments, we used  
136 newts exposed via water bath, housed terrestrially and swabbed every 6 days for comparisons of  
137 exposure route, housing conditions and swabbing frequency. These newts only differed from the  
138 other treatment group by the specific method being compared. For example, the water bath and  
139 pipette-exposed newts were exposed to the same passage isolate and zoospores harvested from  
140 plates, and newts were housed terrestrially after *Bsal* exposure and swabbed every 6-days.

### 141 **Bsal Passage History Experiment**

142 To test whether passage history of cultures affected *Bsal* pathogenicity, we randomly  
143 exposed newts to isolates from one of two culture treatments: 20 and 200 passages. We defined a  
144 passage as splitting cultures by inoculating 1 mL of TGhL broth containing suspended *Bsal* into  
145 9 mL of new TGhL broth(23).

### 146 **Bsal Zoospore Exposure Route Experiment**

147 We tested if route of zoospore exposure influenced pathogenicity by randomly exposing  
148 newts to zoospores in water (as previously described) or by pipette inoculation. The pipette-  
149 inoculated newts were exposed by pipetting 1 mL of *Bsal* inoculum onto the dorsal aspect of the  
150 newt similar to Martel et al.(9).

### 151 **Bsal Culture Type Experiment**

152 We tested for differences in *Bsal* pathogenicity between culturing methods by randomly  
153 exposing newts to either inoculum collected from TGhL plates (as previously described and done  
154 by Longo et al.(14)) or to zoospores harvested from TGhL broth media containing suspended



155 *Bsal* similar to Martel et al.(9). We filtered the broth media identical to TGhL plates to create the  
156 inoculum.

## 157 **Housing Experiment**

158 To test for whether housing conditions (terrestrial vs. aquatic) affected pathogenicity, we  
159 randomly assigned newts to either terrestrial containers (as described before) or to similarly sized  
160 containers with 300 mL of aged dechlorinated water and a PVC cover object following the 24-hr  
161 exposure to *Bsal*.

## 162 **Newt Swabbing Frequency Experiment**

163 Lastly, we tested whether swabbing frequency impacted *Bsal* pathogenicity by randomly  
164 assigning newts to one of three swabbing frequencies: swabbed only at necropsy, every six days  
165 or every 12 days. Swabbing technique was identical among treatments and followed Boyle et  
166 al.(20).

## 167 **Statistical analyses**

168 We compared median survival rates among treatments for each experiment using Kaplan-  
169 Meier analysis and the statistical software R (Version 3.6.1)(24). We evaluated differences  
170 between two or more survival curves at  $\alpha = 0.05$  using the “survdif” function in the survival  
171 package(25, 26). Hazard ratios were calculated using the “coxph” function in the survival  
172 package for a robust estimate of the magnitude of treatment differences (25). We compared  
173 copies of *Bsal* DNA per uL extracted from swabs collected at necropsy using Wilcoxon rank  
174 sum tests or Kruskal-Wallis tests when comparing multiple groups, because data did not follow a  
175 normal distribution. If there were >2 treatments and the Kruskal-Wallis test was significant, we

176 used Wilcoxon tests corrected with the Benjamin and Hochberg adjustment for post-hoc  
177 treatment comparisons. All *Bsal* copy comparisons were made using the stats package in R studio  
178 (24).

179

## 180 **Ethics statement**

181 All husbandry and euthanasia procedures followed recommendations provided by the  
182 Association of Zoos and Aquariums and the American Veterinary Medical Association, and were  
183 approved by the University of Tennessee Institutional Animal Care and Use Committee  
184 (Protocol #2395). Newts that reached euthanasia endpoints were humanely euthanized via  
185 transdermal exposure to benzocaine hydrochloride.

186

## 187 **Results**

188 Survival of eastern newts exposed to the P200 culture was significantly greater than  
189 newts exposed to the P20 culture ( $X^2=11.4$   $P<0.001$ ; Fig. 1a). The odds of an individual dying  
190 when exposed to the P20 culture were 7.8X times greater than the P200 culture. Although *Bsal*  
191 loads were high in all animals that died ( $\bar{x}=36,577$  copies per uL), copies at necropsy did not  
192 differ significantly between treatments ( $W=28$ ,  $P=0.18$ ).

193

194 **Fig. 1 (A-E). Kaplan-Meier survival curves showing survival of eastern newts**  
195 **(*Notophthalmus viridescens*) exposed to *Bsal* zoospores. Log-rank test ( $\chi^2$ ) and *P*-values**

196 **evaluating differences among survival curves for each experiment are shown for animals**  
197 **exposed to P20 or P200 isolates (A), animals exposed to *Bsal* via pipette or water bath**  
198 **inoculation (B), animals housed aquatically or terrestrially after exposure (C), animals**  
199 **exposed to *Bsal* zoospores harvested from TGhL agar plates or TGhL broth (D), and**  
200 **animals swabbed either every 6 days, every 12 days or only at necropsy (E).**

201

202 Survival of newts exposed to zoospores via pipette inoculation was greater than newts  
203 inoculated via water bath ( $X^2=11.6$   $P<0.001$ , Fig. 1b). The odds of an individual dying when  
204 exposed to *Bsal* in a water bath were >100X times greater than pipette exposure on the dorsum.  
205 No significant differences in *Bsal* loads at necropsy were detected between these two treatments  
206 ( $W=14$ ,  $P=0.59$ ).

207 We detected no differences in survival between liquid cultures and flooded plates  
208 ( $X^2=1.9$   $P=0.13$ ; Fig. 1d). *Bsal* loads were similar among treatments for animals exposed to  
209 zoospores harvested from liquid and plated cultures ( $W=16.5$ ,  $P=0.07$ ).

210 Survival of *Bsal*-exposed newts was significantly greater for individuals housed  
211 aquatically compared to those housed terrestrially ( $X^2=5.3$   $P=0.02$ , Fig. 1c). The odds of an  
212 infected newt dying in terrestrial containers were 4X greater than newts housed aquatically. No  
213 differences were detected in *Bsal* loads at necropsy between housing treatments ( $W=15$ ,  
214  $P=0.69$ ).

215 We detected no differences in survival among swabbing frequencies ( $X^2=0.7$   $P=0.7$ ; Fig.  
216 1e). *Bsal* loads were also similar among animals swabbed at different frequencies ( $X^2=1.54$ ,  
217  $P=0.46$ ).

218 For all animals that died, we observed histological signs of *Bsal* chytridiomycosis (Fig.  
219 2). No control animals died during the study or were qPCR positive for *Bsal* DNA at the end of  
220 the experiment. Additionally, no animals tested positive for *Bd* infections at the start of end of  
221 the experiment.

222

223 **Fig. 2. Hematoxylin and eosin stained sections of skin from morbid eastern newts**  
224 **(*Notophthalmus viridescens*) showing epidermal invasion by *Batrachochytrium***  
225 ***salamandrivorans* (*Bsal*; arrows) for all treatments: passage duration (A = P200, B = P20),**  
226 **water bath (C) vs. pipette exposure (D), plated culture (E) vs. liquid broth (F), aquatic (G)**  
227 **vs. terrestrial husbandry (H), or swabbing frequency (A – G = 6 days, H = 12 days, I =**  
228 **necropsy only). Bar =10  $\mu$ m.**

229

## 230 Discussion

231 We found that *Bsal*-induced mortality was greater for eastern newts when exposed to the  
232 low passage isolate, when newts were exposed to zoospores via water bath, and when newts  
233 were housed in terrestrial environments. Newts exposed to the P20 isolate had greater odds of  
234 dying from *Bsal* chytridiomycosis compared to the P200 isolate, indicating differences in  
235 pathogenicity caused by passage history. Several studies on the genetically similar *Bd* chytrid  
236 fungus have reported loss of pathogen virulence associated with greater number of passages in  
237 culture(16, 17, 27). Increased passage number can reduce zoospore production rate and total  
238 number of zoospores produced by zoosporangia(27). Although this may have occurred in our  
239 study, we controlled for potential differences in production by enumerating zoospores and

240 verifying viability using flow cytometry, and all individuals were exposed to a common dose.  
241 Reduced selection or differential expression of virulence genes in culture could have influenced  
242 pathogenicity (17), as suggested by studies comparing *Bd* that was recently isolated from wild  
243 hosts to *Bd* in cell culture. For example, Ellison et al. (16) found that *Bd* transcriptomes isolated  
244 from two infected amphibian hosts exhibited higher expression of genes associated with  
245 increased virulence when compared to a *Bd* culture grown in the lab. Rosenblum et al. (28) also  
246 reported that *Bd* cultured on frog skin displayed a greater number of genes coding for proteases  
247 that affect pathogenicity when compared to *Bd* cultured using tryptone media(29). Hence, the  
248 differences that we observed in *Bsal*'s pathogenicity may have been driven by genomic changes,  
249 phenotypic expression of virulence genes, or shifts in population composition of zoospores to  
250 less virulent types in the long-passage isolate.

251         Newts exposed to *Bsal* via 24-hr water bath had >100X greater odds of dying due to the  
252 pathogen than individuals exposed by directly pipetting the pathogen on the animal's dorsum,  
253 which may be related to a greater exposed skin surface area in water for pathogen encystment. If  
254 so, increased encystment could have led to faster and more severe disease development. It is  
255 possible that viability of zoospores pipetted onto the dorsum of an animal also declined more  
256 rapidly than zoospores in a water bath, because *Bsal* is predominantly an aquatic pathogen and  
257 viability of *Bsal* zoospores decreases rapidly on dry substrate(4). Thus, infection efficiency of  
258 *Bsal* zoospores in water may have contributed to the differences in newts resisting infection.

259         Exposure to *Bsal* zoospores collected by flooding TGhL agar plates resulted in greater  
260 final mortality (62.5%) than exposure to zoospores grown in and collected from TGhL broth  
261 (25%). Although these differences in mortality were not statistically significant, they represent a  
262 2.5-fold difference in experimental outcomes. Harvesting *Bsal* from TGhL might more closely

263 resemble the natural life cycle of *Bsal* (i.e., zoospore encysts in the epidermis of the host, forms a  
264 zoosporangium, and it releases zoospores(5)). Growing *Bsal* in TGhL broth may represent an  
265 alteration from the typical life cycle and select for zoospores and zoosporangia that grow well  
266 when immersed in a nutrient solution rather than when adhered to a substrate, including skin.  
267 TGhL broth cultures also might result in mixed-aged cultures with fewer infectious motile  
268 zoospores compared to more synchronized, even-aged zoospore release on agar plates.

269 Eastern newts that were housed terrestrially had 4X greater odds of experiencing *Bsal*-  
270 induced mortality than those housed aquatically. Although adult eastern newts can be found in  
271 terrestrial environments (30, 31), this age class is found most often in aquatic systems (32). Our  
272 study animals were collected from a permanent wetland (i.e., pond), thus the terrestrial  
273 environment may have resulted in greater host stress. Increased stress can compromise immune  
274 function and thus potentially facilitate greater zoospore infection and disease progression (33).  
275 We also observed that aquatically housed newts were able to shed their skin more easily, which  
276 may decrease infection loads and thereby reduce the severity of chytridiomycosis because  
277 zoospores are shed into the environment rather than being confined to the animal's skin.

278 Lastly, swabbing frequency had no apparent effect on survival or *Bsal* loads. Although  
279 swabbing can remove zoospores(18), it likely does not remove all zoosporangia, which can  
280 extend deeper into the stratum corneum and stratum granulosum(34, 35). In histological cross-  
281 sections, we observed removal of epidermal layers, presumably from swabbing, and the presence  
282 of zoosporangia thereafter. Although we did not measure indicators of stress response, it is likely  
283 that newts which were never swabbed experienced less stress than swabbed individuals;  
284 however, perhaps acute presence of immunosuppressive stress hormones, associated with  
285 handling, were offset by some zoospore removal during swabbing(33, 36).

286 Collectively, our results might provide some additional insight into the differences  
287 observed between Martel et al. (9) and Longo et al.(14). In particular, the isolate use by Martel et  
288 al. (9) was lower passage and they housed newts terrestrially; whereas, newts had a choice  
289 between aquatic and terrestrial environments in Longo et al. (14). These methodological  
290 differences between the two studies might explain why Martel et al. (9) observed greater  
291 mortality than Longo et al. (14) even though the same species was challenged. Interestingly,  
292 Longo et al. (14) exposed newts to zoospores in a water bath, yet observed less mortality than  
293 Martel et al. (9) who pipetted the pathogen on the dorsum of newts. Hence, exposure method  
294 might have less of an effect on *Bsal* pathogenicity than isolate passage duration and housing  
295 conditions.

296 Our results highlight the importance of standardizing methods in *Bsal* experiments if  
297 results are going to be compared among studies, or at a minimum acknowledging how  
298 methodological differences could lead to biases in interpreting disease outcomes. Given our  
299 results, we provide suggestions for future *Bsal* exposure experiments. We recommend that low-  
300 passage (<20 passages) inoculum be used for all experiments to facilitate study comparisons,  
301 unless the objective is to understand *Bsal* evolution or gene expression in culture. We also  
302 recommend flooding TGhL agar plates to collect zoospores, and that the exposure route be  
303 chosen to mimic the most likely transmission pathway in nature. For example, transmission of  
304 *Bsal* in fire salamanders likely occurs most often during terrestrial breeding events via contact(4,  
305 37). Hence, pipetting inoculum on the animal might represent the most realistic route of exposure  
306 as it more closely mimics a direct contact scenario. Exposure to *Bsal* in a water bath likely  
307 represents a common transmission pathway for aquatic species such as adult eastern newts.  
308 Similarly, we recommend that the housing conditions represent the most likely environment of

309 the host, and for hosts that use both environments, the option to enter and leave water should be  
310 provided. Lastly, we recommend that the standardized swabbing protocol for *Bd* is followed  
311 [18]; however, swabbing frequency should depend on the study objectives. For studies where  
312 tracking infection dynamics is essential, swabbing once per week should capture changes in  
313 prevalence and loads given that the *Bsal* infected animals typically survive for several weeks (9,  
314 10), allowing for comparisons over time. However, swabbing can affect histological  
315 interpretation of disease progression by removing skin layers (DLM, person. observ.). Given that  
316 swabbing frequency did not impact *Bsal*-induced mortality in our study, swabbing a subset of  
317 individuals for infection data and using a different set of non-swabbed animals for histological  
318 examination and disease determination might be an appropriate methodological design.

319         One caveat of all methods used throughout this series of challenge experiments is that  
320 they do not necessarily reflect the conditions amphibians experience as they encounter pathogens  
321 in a natural environment. However, in order to understand the complexities of natural disease  
322 systems, it is often useful to evaluate possible factors individually and in combination with a  
323 controlled, common-garden experimental design then scale-up influential factors to mesocosm or  
324 natural experiments. Reducing methodological differences among controlled studies increases  
325 the likelihood that outcomes observed reflect true biological processes.

326

## 327 **Acknowledgments**

328 This work was partially supported by the National Science Foundation Division of  
329 Environmental Biology (EEID Grant # 1814520) and USDA National Institute of Food and  
330 Agriculture (Hatch Project 1012932) awarded to MJG and DLM. We would like to acknowledge



331 Dr. Jeffrey Kovac and the University of Tennessee College Scholars Program for providing  
332 support to DAM. We thank Dr. Bobby Simpson and Alex Anderson of the University of  
333 Tennessee East Tennessee Research and Education Center for laboratory and logistical support.  
334 We also thank Brian Gleaves, Ciara Sheets, Ana Towe, and Bailee Augustino for assistance with  
335 animal care and data collection.

336

## 337 **References**

- 338 1. Yap TA, Koo MS, Ambrose RF, Wake DB, Vredenburg VT. Averting a North American  
339 biodiversity crisis. *Science*. 2015;349(6247):481-2.
- 340 2. Richgels KLD, Russell RE, Adams MJ, White CL, Grant EHC. Spatial variation in risk  
341 and consequence of *Batrachochytrium salamandrivorans* introduction in the USA.  
342 *Royal Society Open Science*. 2016;3(2).
- 343 3. Gray MJ, Lewis JP, Nanjappa P, Klocke B, Pasmans F, Martel A, et al. *Batrachochytrium*  
344 *salamandrivorans*: The North American Response and a Call for Action. *PLOS Pathogens*.  
345 2015;11(12):e1005251.
- 346 4. Stegen G, Pasmans F, Schmidt BR, Rouffaer LO, Van Praet S, Schaub M, et al. Drivers  
347 of salamander extirpation mediated by *Batrachochytrium salamandrivorans*. *Nature*.  
348 2017;544(7650):353.
- 349 5. Martel A, Spitzen-van der Sluijs A, Blooi M, Bert W, Ducatelle R, Fisher MC, et al.  
350 *Batrachochytrium salamandrivorans* sp nov causes lethal chytridiomycosis in amphibians.  
351 *Proceedings of the National Academy of Sciences of the United States of America*.  
352 2013;110(38):15325-9.

- 353 6. Sabino Pinto J, Bletz M, Hendrix R, Perl R, Martel A, Pasmans F, et al. First detection of  
354 the emerging fungal pathogen *Batrachochytrium salamandrivorans* in Germany. *Amphibia -*  
355 *Reptilia*. 2015; 36(4):411- 416.
- 356 7. Nguyen TT, Nguyen ThV, Ziegler T, Pasmans F, Martel A. Trade in wild anurans vectors  
357 the urodelan pathogen *Batrachochytrium salamandrivorans* into Europe. *Amphibia-Reptilia*.  
358 2017;38(4):554-6.
- 359 8. Fitzpatrick LD, Pasmans F, Martel A, Cunningham AA. Epidemiological tracing of  
360 *Batrachochytrium salamandrivorans* identifies widespread infection and associated mortalities in  
361 private amphibian collections. *Scientific Reports*. 2018;8:10.
- 362 9. Martel A, Blooi M, Adriaensen C, Van Rooij P, Beukema W, Fisher MC, et al. Recent  
363 introduction of a chytrid fungus endangers Western Palearctic salamanders. *Science*.  
364 2014;346(6209):630-1.
- 365 10. Carter ED, Miller DL, Peterson AC, Sutton WB, Cusaac JPW, Spatz JA, et al.  
366 Conservation risk of *Batrachochytrium salamandrivorans* to endemic lungless salamanders.  
367 *Conservation Letters*. 2019; e12675.
- 368 11. Johnson PTJ, Ostfeld RS, Keesing F. *Frontiers in research on biodiversity and disease*.  
369 *Ecology letters*. 2015;18(10):1119-33.
- 370 12. Gray MJ, Chinchar VG. *Ranaviruses: lethal pathogens of ectothermic vertebrates*:  
371 Springer; 2015.
- 372 13. Sauer EL, Cohen JM, Lajeunesse MJ, McMahon TA, Civitello DJ, Knutie SA, et al. A  
373 meta-analysis reveals temperature, dose, life stage, and taxonomy influence host susceptibility to  
374 a fungal parasite. *bioRxiv*. 2019:818377.

- 375 14. Longo A, Fleischer RC, Lips K. Double trouble: co-infections of chytrid fungi will  
376 severely impact widely distributed newts. *Biological Invasions*. 2019;21.
- 377 15. Scheele BC, Pasmans F, Skerratt LF, Berger L, Martel A, Beukema W, et al. Amphibian  
378 fungal panzootic causes catastrophic and ongoing loss of biodiversity. *Science*.  
379 2019;363(6434):1459.
- 380 16. Ellison AR, DiRenzo GV, McDonald CA, Lips KR, Zamudio KR. First in Vivo  
381 *Batrachochytrium dendrobatidis* Transcriptomes Reveal Mechanisms of Host Exploitation, Host-  
382 Specific Gene Expression, and Expressed Genotype Shifts. *G3 (Bethesda, Md)*. 2017;7(1):269-  
383 78.
- 384 17. Refsnider JM, Poorten TJ, Langhammer PF, Burrowes PA, Rosenblum EB. Genomic  
385 Correlates of Virulence Attenuation in the Deadly Amphibian Chytrid  
386 Fungus, *Batrachochytrium dendrobatidis*. *G3: Genes|Genomes|Genetics*. 2015;5(11):2291.
- 387 18. Hyatt AD, Boyle DG, Olsen V, Boyle DB, Berger L, Obendorf D, et al. Diagnostic  
388 assays and sampling protocols for the detection of *Batrachochytrium dendrobatidis*. *Diseases of*  
389 *Aquatic Organisms*. 2007;73(3):175-92.
- 390 19. Medzhitov R, Schneider DS, Soares MP. Disease Tolerance as a Defense Strategy.  
391 *Science*. 2012;335(6071):936.
- 392 20. Boyle DG, Boyle DB, Olsen V, Morgan JAT, Hyatt AD. Rapid quantitative detection of  
393 chytridiomycosis (*Batrachochytrium dendrobatidis*) in amphibian samples using real-time  
394 Taqman PCR assay. *Diseases of aquatic organisms*. 2004;60(2):141-8.
- 395 21. Blooi M, Pasmans F, Longcore JE, Spitzen-van der Sluijs A, Vercammen F, Martel A.  
396 Duplex real-time PCR for rapid simultaneous detection of *Batrachochytrium dendrobatidis* and

- 397 Batrachochytrium salamandrivorans in Amphibian samples. Journal of clinical microbiology.  
398 2013;51(12):4173-7.
- 399 22. Thomas V, Blooi M, Van Rooij P, Van Praet S, Verbrugghe E, Grasselli E, et al.  
400 Recommendations on diagnostic tools for Batrachochytrium salamandrivorans. Transbound  
401 Emerg Dis. 2018;65(2):e478-e88.
- 402 23. Voyles J, Johnson LR, Briggs CJ, Cashins SD, Alford RA, Berger L, et al. Experimental  
403 evolution alters the rate and temporal pattern of population growth in Batrachochytrium  
404 dendrobatidis, a lethal fungal pathogen of amphibians. Ecol Evol. 2014;4(18):3633-41.
- 405 24. Team RC. R: A language and environment for statistical computing. Vienna, Austria: R  
406 Foundation for Statistical Computing; 2019.
- 407 25. Terry M. Therneau, Patricia M. Grammbasch. Modeling Survival Data: Extending the  
408 Cox Model. Springer, New York: R Foundation for Statistical Computing; 2000.
- 409 26. Jager KJ, van Dijk PC, Zoccali C, Dekker FW. The analysis of survival data: the Kaplan-  
410 Meier method. Kidney Int. 2008;74(5):560-5.
- 411 27. Langhammer PF, Lips KR, Burrowes PA, Tunstall T, Palmer CM, Collins JP. A Fungal  
412 Pathogen of Amphibians, Batrachochytrium dendrobatidis, Attenuates in Pathogenicity with In  
413 Vitro Passages. PLOS ONE. 2013;8(10):e77630.
- 414 28. Rosenblum EB, Poorten TJ, Joneson S, Settles M. Substrate-Specific Gene Expression in  
415 Batrachochytrium dendrobatidis, the Chytrid Pathogen of Amphibians. PLOS ONE.  
416 2012;7(11):e49924.
- 417 29. Farrer RA, Martel A, Verbrugghe E, Abouelleil A, Ducatelle R, Longcore JE, et al.  
418 Genomic innovations linked to infection strategies across emerging pathogenic chytrid fungi.  
419 Nature Communications. 2017;8(1):14742.

- 420 30. Walters PJ, Greenwald L. Physiological Adaptations of Aquatic Newts (*Notophthalmus*  
421 *viridescens*) to a Terrestrial Environment. *Physiological Zoology*. 1977;50(2):88-98.
- 422 31. Roe AW, Grayson K. Terrestrial movements and habitat use of juvenile and emigrating  
423 adult eastern red-spotted newts, *Notophthalmus viridescens*. *J. Herp.* 2008; 42(1), 22-30.
- 424 32. Gill DE. The Metapopulation Ecology of the Red-Spotted Newt, *Notophthalmus*  
425 *viridescens* (Rafinesque). *Ecological Monographs*. 1978;48(2):145-66.
- 426 33. Rollins-Smith LA. Amphibian immunity–stress, disease, and climate change.  
427 *Developmental & Comparative Immunology*. 2017;66:111-9.
- 428 34. Van Rooij P, Martel A, Haesebrouck F, Pasmans F. Amphibian chytridiomycosis: a  
429 review with focus on fungus-host interactions. *Vet Res*. 2015;46:137.
- 430 35. Ossiboff RJ, Towe AE, Brown MA, Longo AV, Lips KR, Miller DL, et al.  
431 Differentiating *Batrachochytrium dendrobatidis* and *B. salamandrivorans* in Amphibian  
432 Chytridiomycosis Using RNAScope® in situ Hybridization. *Frontiers in Veterinary Science*.  
433 2019;6:304.
- 434 36. Graham SP, Kelehear C, Brown GP, Shine R. Corticosterone-immune interactions during  
435 captive stress in invading Australian cane toads (*Rhinella marina*). *Hormones and behavior*.  
436 2012;62(2):146-53.
- 437 37. Schmidt BR, Bozzuto C, Lotters S, Steinfartz S. Dynamics of host populations affected  
438 by the emerging fungal pathogen *Batrachochytrium salamandrivorans*. *R Soc Open Sci*.  
439 2017;4(3):160801.

440

441

## 442 **Supporting information**

443 Data and R Code for the analyses are provided in S1. (*editorial note*: public repository link to be  
444 provided upon acceptance)



446 Table 1: Experiment, treatment, life-stage tested, exposure dose, exposure method, culture type, swabbing frequency, sample size (n),  
 447 and descriptive statistics (mean and standard deviation, SD) for animals that died or survived the experiment. Also shown are Wilcoxon  
 448 rank-sum and Kruskal-Wallis tests comparing *Bsal* loads of all animals that died during the experiment as well as test results  
 449 comparing all animals used in each treatment.

| Experiment         | Treatment               | Life Stage | Exposure Dose                  | Exposure   | Culture Type | Swabbing Frequency | N             | Dead Animal Bsal Copies/uL |              | Survived Animal Bsal Copies/uL |            | Necropsy Copies/uL ~ Treatment for Dead Animals |      | Necropsy Copies/uL ~ Treatment for All Animals |      |   |
|--------------------|-------------------------|------------|--------------------------------|------------|--------------|--------------------|---------------|----------------------------|--------------|--------------------------------|------------|-------------------------------------------------|------|------------------------------------------------|------|---|
|                    |                         |            |                                |            |              |                    |               | μ(N)                       | SD           | μ(N)                           | SD         | W or X <sup>2</sup>                             | P    | W or X <sup>2</sup>                            | P    |   |
| Passage            | Control                 | Adult      | Autoclaved Dechlorinated Water | Water Bath | Plate        | Every 6 Days       | 5             |                            |              | 0(5)                           | 0          | 4                                               | 0.08 | 28                                             | 0.11 |   |
|                    | 20X                     | Adult      | 1x10e6                         |            |              |                    | 10            | 46926.54(10)               | 47720.7      |                                |            |                                                 |      |                                                |      |   |
|                    | 200X                    | Adult      | 1x10e6                         |            |              |                    | 10            | 2078.95(3)                 | 31515.71     | 16965.51(7)                    | 118048.33  |                                                 |      |                                                |      |   |
| Exposure           | Control (Water Bath)**  | Adult      | Autoclaved Dechlorinated Water | Water Bath | Plate        | Every 6 Days       | 2             |                            |              | 0(2)                           | 0          | 2                                               | 0.1  | 14                                             | 0.6  |   |
|                    | Control (Pipette)       | Adult      | Autoclaved Dechlorinated Water | Pipette    |              |                    | 2             |                            |              | 0(2)                           | 0          |                                                 |      |                                                |      |   |
|                    | Water Bath*             | Adult      | 5x10e6                         | Water Bath |              |                    | 6             | 57400.43(6)                | 35511.13     |                                |            |                                                 |      |                                                |      |   |
|                    | Pipette                 | Adult      | 5x10e6                         | Pipette    |              |                    | 6             | 28862.68(3)                | 14059.314    | 59507.97(3)                    | 9387.464   |                                                 |      |                                                |      |   |
| Culture Type       | Control                 | Eft        | Autoclaved Dechlorinated Water | Water Bath | Liquid Broth | Every 6 Days       | 3             |                            |              | 0(3)                           | 0          | 3.5                                             | 0.7  | 16.5                                           | 0.07 |   |
|                    | Liquid                  | Eft        | 1x10e5                         |            |              |                    | 8             | 3432.88(2)                 | 4854.83      | 0(6)                           | 0          |                                                 |      |                                                |      |   |
|                    | Plated                  | Eft        | 1x10e5                         |            |              |                    | 8             | 9410.3(5)                  | 12377.91     | 45.99(3)                       | 79.65      |                                                 |      |                                                |      |   |
|                    | Control (Aquatic)       | Adult      | Autoclaved Dechlorinated Water |            |              |                    | Plate         | 2                          |              |                                | 0          |                                                 |      |                                                |      | 0 |
| Housing            | Control (Terrestrial)** | Adult      | Autoclaved Dechlorinated Water | Water Bath | Plate        | Every 6 Days       | 2             |                            |              | 0                              | 0          | 10                                              | 0.91 | 15                                             | 0.7  |   |
|                    | Aquatic                 | Adult      | 5x10e6                         |            |              |                    | 6             | 61648.91(3)                | 33928.65     | 36581.91(3)                    | 54367.21   |                                                 |      |                                                |      |   |
|                    | Terrestrial*            | Adult      | 5x10e6                         |            |              |                    | 6             | 57400.43(6)                | 35511.13     |                                |            |                                                 |      |                                                |      |   |
|                    | Control (6 day swab)**  | Adult      | Autoclaved Dechlorinated Water |            |              |                    | Every 6 Days  | 2                          |              |                                | 0(2)       |                                                 |      |                                                |      | 0 |
| Swabbing Frequency | Control (12 day swab)   | Adult      | Autoclaved Dechlorinated Water | Water Bath | Plate        | Every 12 Days      | 2             |                            |              | 0(2)                           | 0          | 3.37                                            | 0.19 | 1.63                                           | 0.44 |   |
|                    | Control (Necropsy swab) | Adult      | Autoclaved Dechlorinated Water |            |              |                    | Only Necropsy | 2                          |              |                                | 0(2)       |                                                 |      |                                                |      | 0 |
|                    | 6 day swab*             | Adult      | 5x10e6                         |            |              |                    | Every 6 Days  | 6                          | 57400.43(6)  | 35511.13                       |            |                                                 |      |                                                |      |   |
|                    | 12 day swab             | Adult      | 5x10e6                         |            |              |                    | Every 12 Days | 6                          | 140061.79(5) | 99881.34                       | 24931.4(1) |                                                 |      |                                                |      |   |
|                    | Necropsy swab           | Adult      | 5x10e6                         |            |              |                    | Only Necropsy | 6                          | 59445.86(6)  | 37745.56                       |            |                                                 |      |                                                |      |   |

450 \*Indicates the experimental group was used for more than one comparison.  
 451

452 \*\*Indicates the control group was used for more than one comparison.  
 453



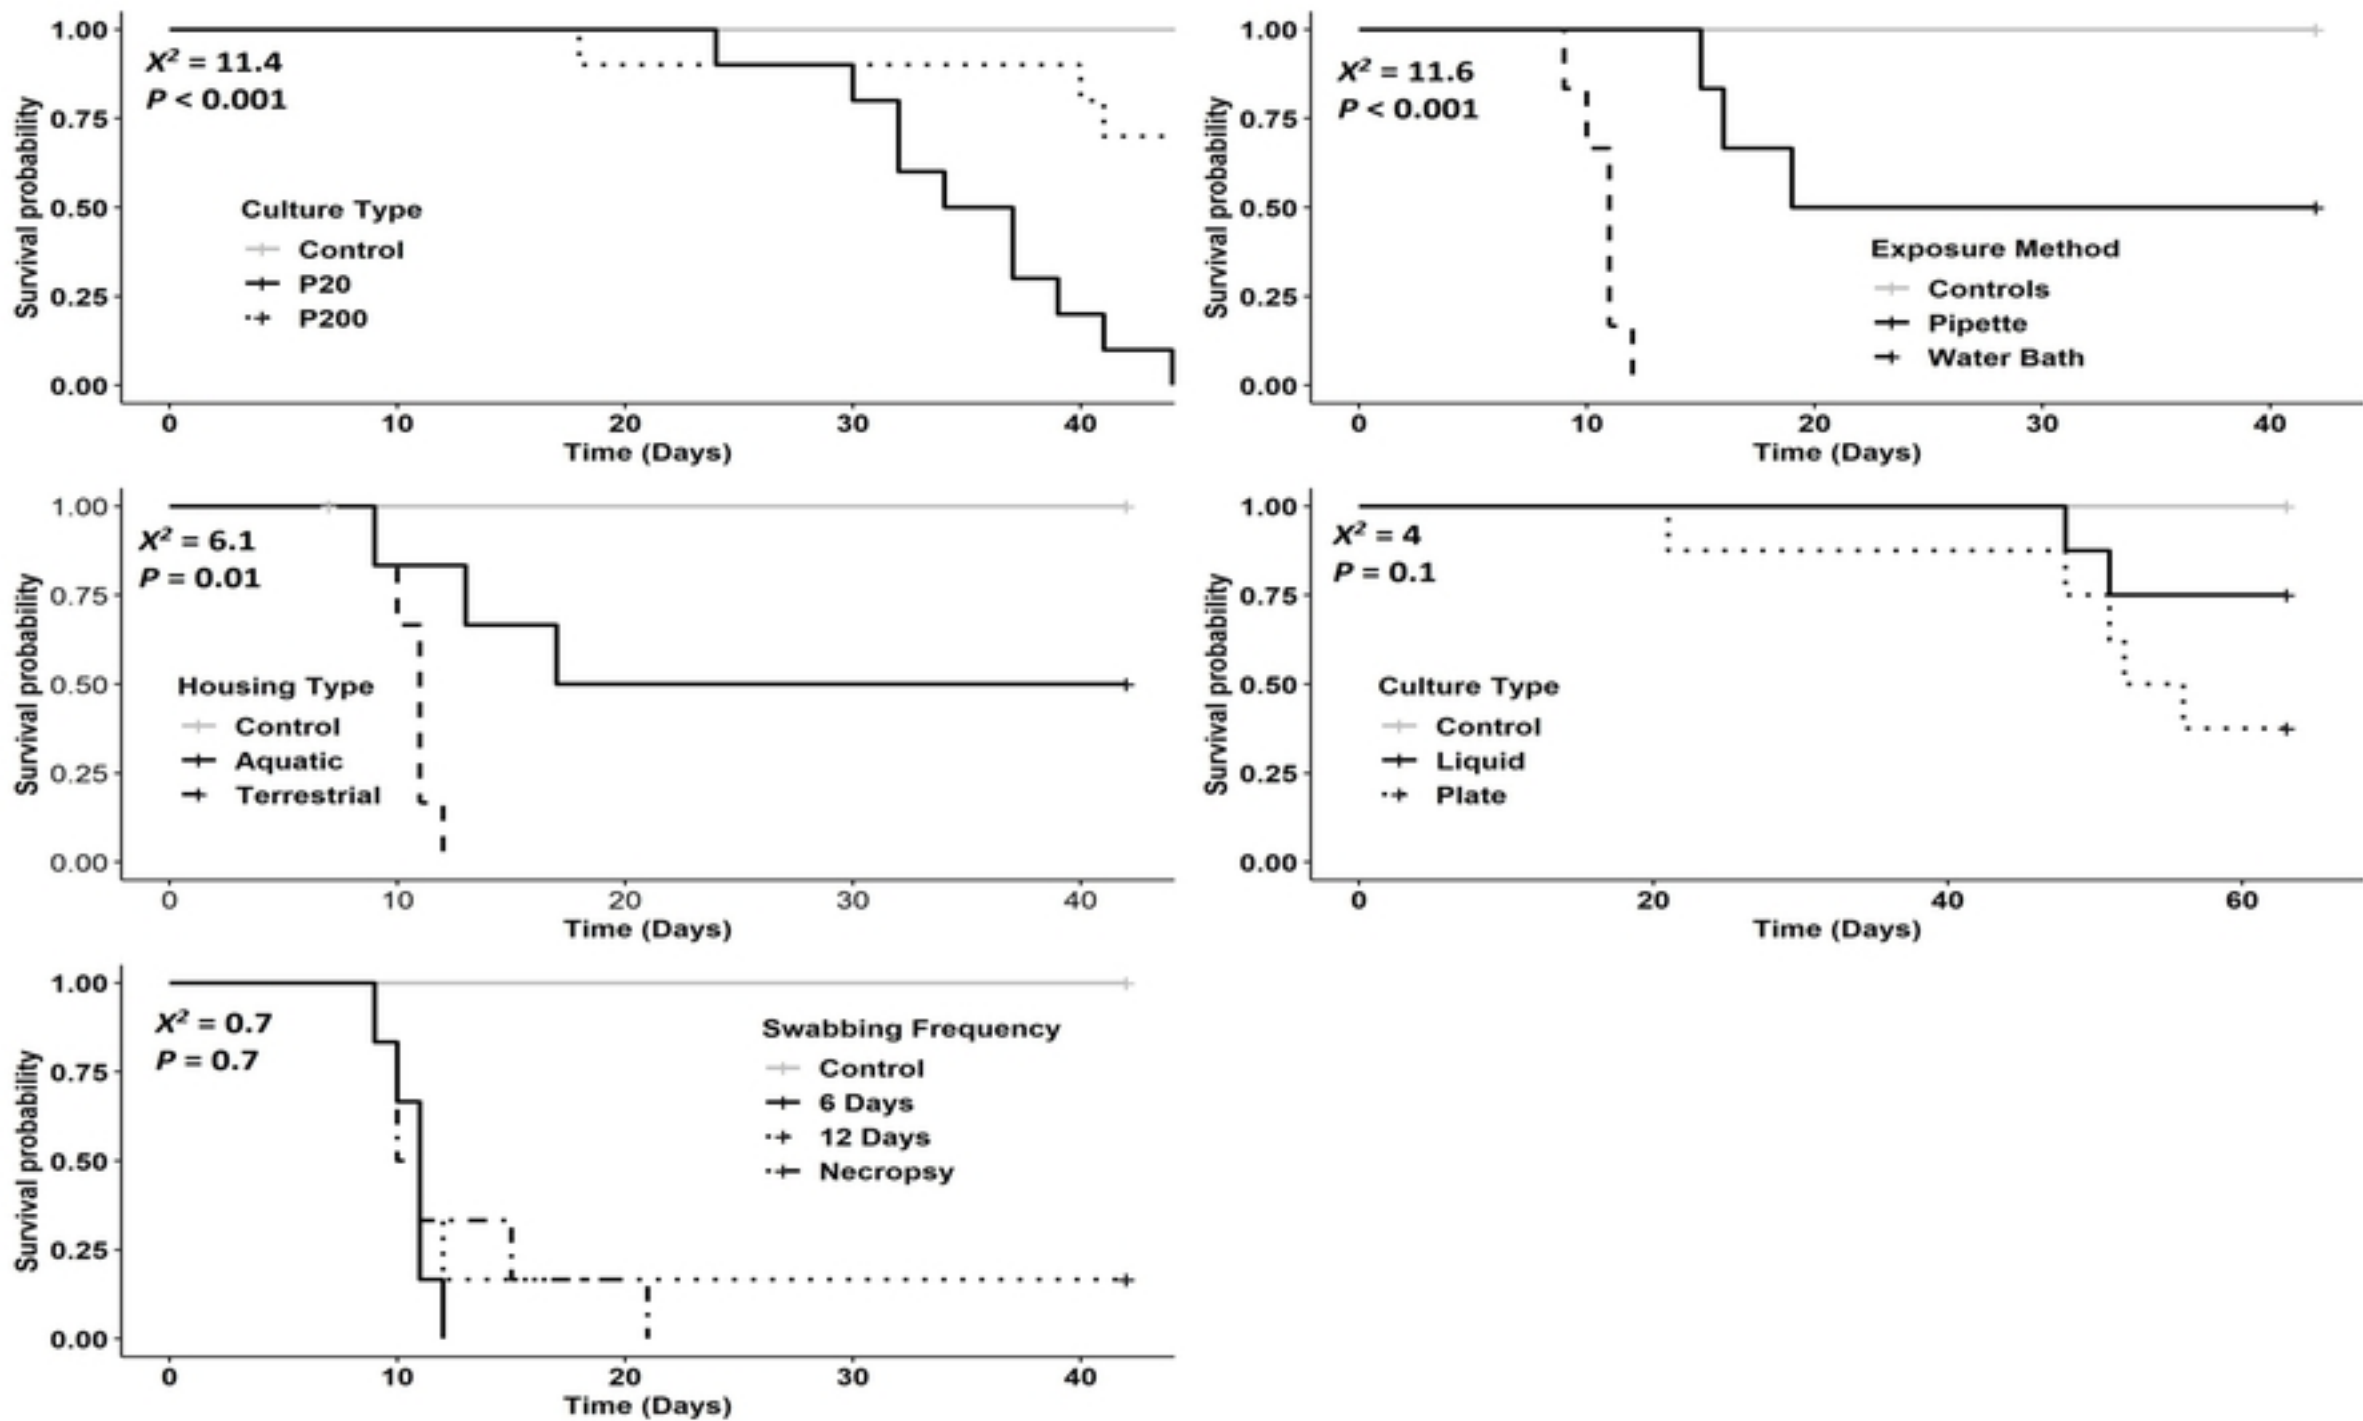

Figure 1



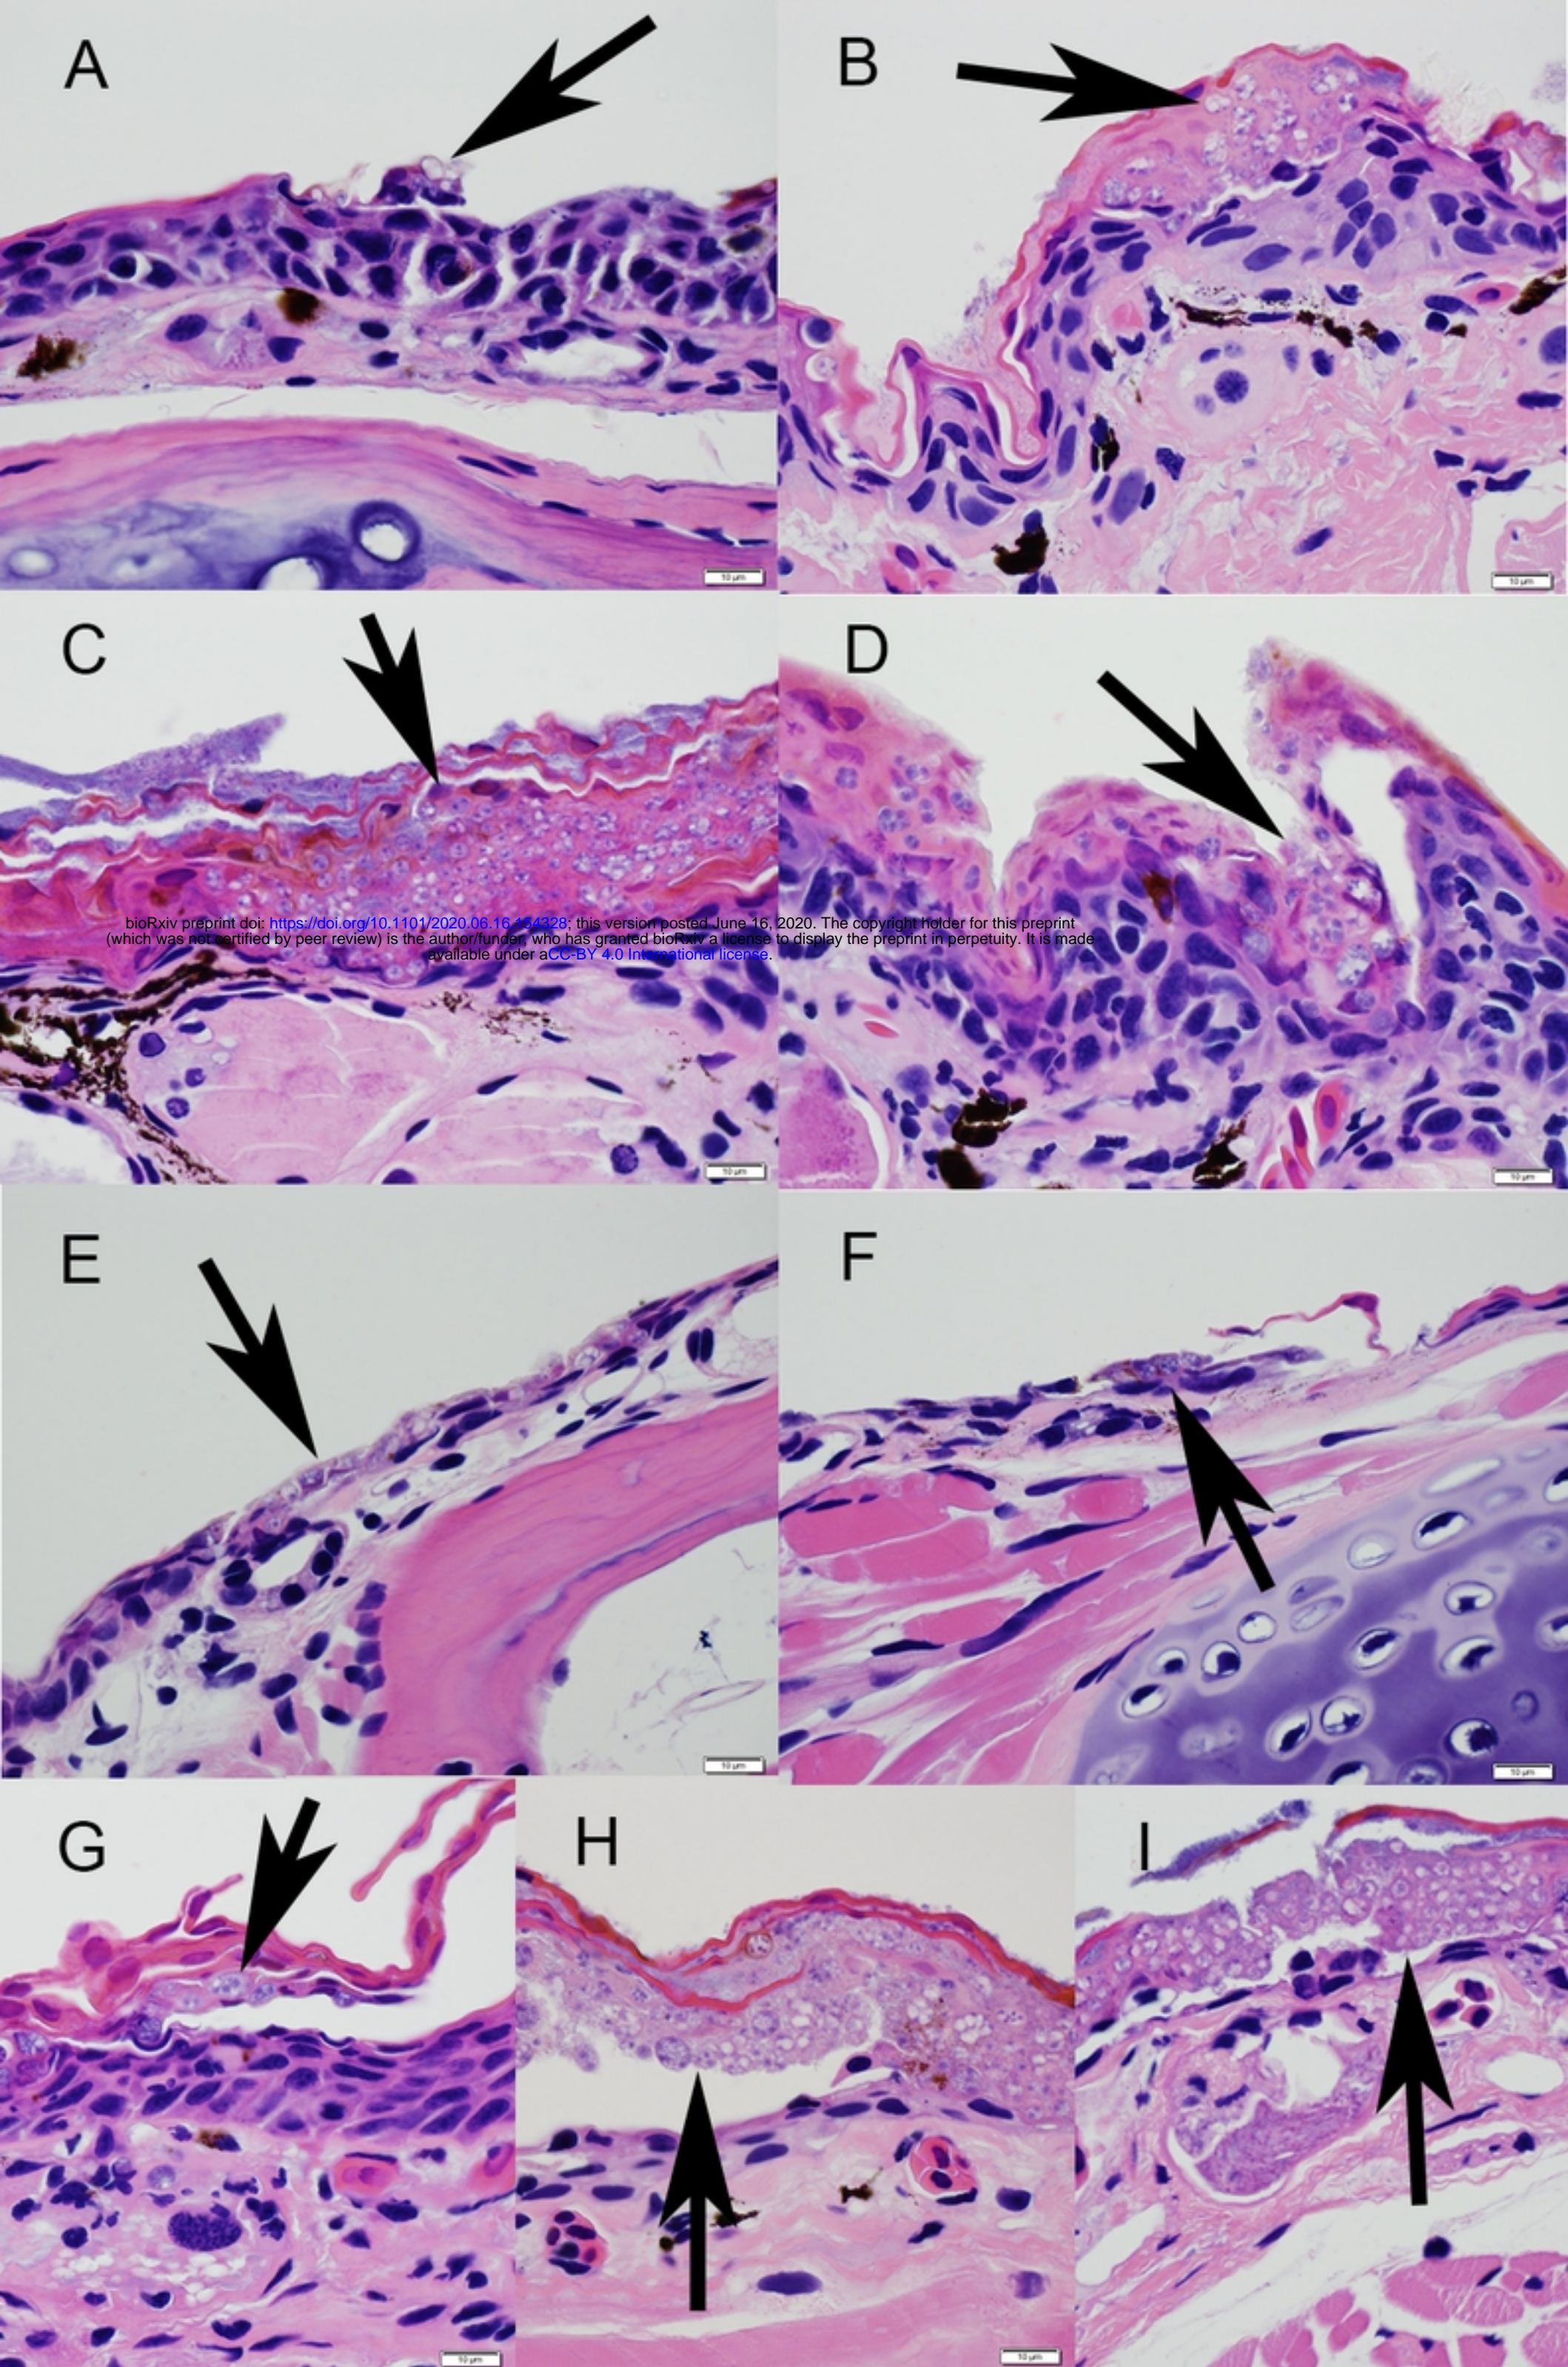

Figure 2
